# Supplementary material for: Comparison of submucosal and subserosal approaches toward optimized indocyanine green tracer-guided laparoscopic lymphadenectomy for patients with gastric cancer (FUGES-019): a randomized controlled trial
Source: Springer Nature journal article supplement (doi:10.1186/s12916-021-02125-y), 2021-10-27
Supplement: MOESM2 [file 19803698]

**Supplemental Content 2. eTables**

**eTable 1.** Eligibility Criteria for Enrolling Patients

**eTable 2.** Checklist for Determining the Success of D2 Lymphadenectomy

**eTable 3.** The modified EORTC IN-PATSAT14 Questionnaire

**eTable 4.** Basic Characteristics of Patients in the SMA and SSA Groups Who Underwent Distal  
Gastrectomy and Total Gastrectomy

**eTable 5.** Number of Retrieved Lymph Nodes in the SMA and SSA Groups According to the D Station

**eTable 6.** Extent of Lymph Node Compliance in the SMA and SSA Groups

**eTable 7.** Number of Metastatic Lymph Nodes in the SMA and SSA Groups

**eTable 8.** Validity of ICG That Emitted Fluorescence and Lymph Node Metastasis

**eTable 9.** Diagnostic Value of Fluorescent Lymphography for the Detection of Metastatic Stations  
According to the Total Number of Stations

**eTable 10.** Surgical Outcomes, Postoperative Recovery, Morbidity, and Mortality in Patients in the  
SMA and SSA Groups Who Underwent Distal Gastrectomy or Total Gastrectomy

**eTable 11.** Cost Difference Between the SMA and SSA Groups

**eTable 12.** Descriptive Statistics of In-patient Satisfaction Scales

**eTable 13.** Comparison of the Mean Surg-TLX Subscales Between the SMA and SSA Groups

**eTable 1. Eligibility Criteria for Enrolling Patients**

---

**Inclusion criteria:**

1. Age from 18 to 75 years
2. Primary gastric adenocarcinoma (papillary, tubular, mucinous, signet ring cell, or poorly differentiated) confirmed pathologically by endoscopic biopsy
3. A tumor stage of T1-4a (cT1-4a), N0/+, M0 at preoperative evaluation according to the American Joint Committee on Cancer (AJCC) Cancer Staging Manual Eighth Edition. Preoperative staging was made by conducting mandatory computed tomography (CT) scans and an optional endoscopic ultrasound
4. No distant metastasis, no direct invasion of pancreas, spleen, or other organs nearby in the preoperative examinations
5. Performance status of 0 or 1 on Eastern Cooperative Oncology Group scale (ECOG)
6. American Society of Anesthesiology score (ASA) class I, II, or III
7. Written informed consent

**Exclusion criteria:**

1. Women during pregnancy or breast-feeding
  2. Severe mental disorder
  3. History of previous upper abdominal surgery (except laparoscopic cholecystectomy)
  4. History of previous gastrectomy, endoscopic mucosal resection, or endoscopic submucosal dissection
  5. Rejection of laparoscopic resection
  6. History of allergy to iodine agents
  7. Enlarged or bulky regional lymph node diameter over 3cm by preoperative imaging
  8. History of other malignant diseases within the past five years
  9. History of previous neoadjuvant chemotherapy or radiotherapy
  10. History of unstable angina or myocardial infarction within the past six months
  11. History of a cerebrovascular accident within the past six months
  12. History of continuous systematic administration of corticosteroids within one month
  13. Requirement of simultaneous surgery for other diseases
  14. Emergency surgery due to complication (bleeding, obstruction, or perforation) caused by gastric cancer
  15. Forced expiratory volume in 1 second (FEV1) < 50% of predicted values
  16. Linitis plastica, Widespread
-

**eTable 2. Checklist for Determining the Success of D2 Lymphadenectomy**

| Scoring Method for D2 Lymph Node Dissection              | Complete                 | Incomplete               | None                     |
|----------------------------------------------------------|--------------------------|--------------------------|--------------------------|
|                                                          | 10                       | 5                        | 0                        |
| 1. Properly full omentectomy                             | <input type="checkbox"/> | <input type="checkbox"/> | <input type="checkbox"/> |
| 2. Ligation of the left gastroepiploic artery at origin  | <input type="checkbox"/> | <input type="checkbox"/> | <input type="checkbox"/> |
| 3. Ligation of the right gastroepiploic artery at origin | <input type="checkbox"/> | <input type="checkbox"/> | <input type="checkbox"/> |
| 4. Full exposure of the common hepatic artery            | <input type="checkbox"/> | <input type="checkbox"/> | <input type="checkbox"/> |
| 5. Ligation of the right gastric artery at origin        | <input type="checkbox"/> | <input type="checkbox"/> | <input type="checkbox"/> |
| 6. Exposure of the portal vein                           | <input type="checkbox"/> | <input type="checkbox"/> | <input type="checkbox"/> |
| 7. Exposure of the splenic artery                        | <input type="checkbox"/> | <input type="checkbox"/> | <input type="checkbox"/> |
| 8. Identification of the splenic vein                    | <input type="checkbox"/> | <input type="checkbox"/> | <input type="checkbox"/> |
| 9. Ligation of the left gastric artery at origin         | <input type="checkbox"/> | <input type="checkbox"/> | <input type="checkbox"/> |
| 10. Exposure of the gastroesophageal junction            | <input type="checkbox"/> | <input type="checkbox"/> | <input type="checkbox"/> |

1. Properly full omentectomy
    - a. Omentectomy was performed close to the transverse colon
    - b. Omentectomy was performed from hepatic flexure to splenic flexure
    - c. The anterior layer of the transverse colonic mesentery and anterior pancreatic peritoneum were dissected.
  2. Ligation of the left gastroepiploic artery at origin
  3. Ligation of the right gastroepiploic artery at origin
  4. Full exposure of common hepatic artery
    - a. More than half of the anterior part of the common hepatic artery was exposed.
  5. Ligation of the right gastric artery at origin
  6. Exposure of the portal vein
  7. Exposure of the splenic artery
    - a. The anterior part in the splenic artery was exposed
    - b. The splenic artery was exposed from the celiac trunk to the posterior gastric artery (distal gastrectomy)
    - c. The splenic artery was exposed from the celiac trunk to the terminal branch of the splenic artery (total gastrectomy)
  8. Identification of the splenic vein
  9. Ligation of the left gastric artery at origin
  10. Exposure of the gastroesophageal junction
    - a. The anterior and right side of the abdominal esophagus were exposed (distal gastrectomy)
    - b. The anterior, posterior, left, and right sides of the abdominal esophagus were exposed (total gastrectomy)
- D2 lymphadenectomy was accepted if all three randomly assigned investigators rated  $\geq 85$  points regarding checklists in the unedited video review.

**eTable 3. The modified EORTC IN-PATSAT14 Questionnaire**

We are interested in your experience of the care received during your hospital stay. Please answer all the questions yourself by circling the number that best applies to you. There are no “right” or “wrong” answers. The information that you provide will remain strictly confidential. Thank you very much.

| During your hospital stay, how would you rate <b>doctors</b> , in terms of |                                                                                              | Poor        | Fair    | Good     | Very good | Excellent  |
|----------------------------------------------------------------------------|----------------------------------------------------------------------------------------------|-------------|---------|----------|-----------|------------|
| 1                                                                          | Their knowledge and experience of your illness?                                              | 1           | 2       | 3        | 4         | 5          |
| 2                                                                          | The treatment and medical follow-up they provided?                                           | 1           | 2       | 3        | 4         | 5          |
| 3                                                                          | Their willingness to listen to all of your concerns?                                         | 1           | 2       | 3        | 4         | 5          |
| 4                                                                          | The information they gave you about your illness, medical tests, and treatment?              | 1           | 2       | 3        | 4         | 5          |
| 5                                                                          | The frequency of their visits/consultations?                                                 | 1           | 2       | 3        | 4         | 5          |
| 6                                                                          | The time they devoted to you during visits/consultations?                                    | 1           | 2       | 3        | 4         | 5          |
| During your hospital stay, how would you rate <b>services</b> in terms of  |                                                                                              | Poor        | Fair    | Good     | Very good | Excellent  |
| 7                                                                          | The information provided on your admission to the hospital?                                  | 1           | 2       | 3        | 4         | 5          |
| 8                                                                          | The information provided on your discharge from the hospital?                                | 1           | 2       | 3        | 4         | 5          |
| 9                                                                          | The kindness and helpfulness of the technical, reception, laboratory personnel?              | 1           | 2       | 3        | 4         | 5          |
| 10                                                                         | The waiting time for obtaining results of medical tests?                                     | 1           | 2       | 3        | 4         | 5          |
| 11                                                                         | The speed of implementing medical tests and/or treatments?                                   | 1           | 2       | 3        | 4         | 5          |
|                                                                            | <b>Special item</b>                                                                          | Quite a lot | Serious | Moderate | Middle    | Not at all |
| 12                                                                         | Was any discomfort caused by the examination or treatment during the hospitalization period? | 1           | 2       | 3        | 4         | 5          |
| 13                                                                         | Is there any examination or treatment that you think is repeated and bother you?             | 1           | 2       | 3        | 4         | 5          |
|                                                                            | <b>Overall</b>                                                                               | Poor        | Fair    | Good     | Very good | Excellent  |
| 14                                                                         | How would you rate the care received during your hospital stay?                              | 1           | 2       | 3        | 4         | 5          |

The modified EORTC IN-PATSAT14 contains five multi-item and three single-item scales. These include the doctors’ technical skills (items 1 and 2), interpersonal skills (item 3), information provision (item 4), availability (items 5 and 6) scales; other hospital staff interpersonal skills and information provision scale (items 7–9); waiting time scale (items 10 and 11); comfort special-item scale (items 12 and 13); and general satisfaction single-item scale (item 14).

**eTable 4. Basic Characteristics of Patients in the SMA and SSA Groups Who Underwent Distal Gastrectomy and Total Gastrectomy**

| Characteristic                 | Distal gastrectomy  |            |         | Total gastrectomy   |             |         |
|--------------------------------|---------------------|------------|---------|---------------------|-------------|---------|
|                                | Mean (SD) / No. (%) |            | P Value | Mean (SD) / No. (%) |             | P Value |
|                                | SMA (n=71)          | SSA (n=65) |         | SMA (n=59)          | SSA (n=64)  |         |
| <b>Age, y</b>                  | 57.0 (12.2)         | 58.3 (9.6) | 0.517   | 60.9 (9.7)          | 59.7 (11.0) | 0.526   |
| <b>BMI, kg/m<sup>2</sup></b>   | 21.8 (3.3)          | 22.2 (2.8) | 0.433   | 23.3 (3.0)          | 22.5 (3.3)  | 0.156   |
| <b>Sex</b>                     |                     |            | 0.612   |                     |             | 0.752   |
| Male                           | 44 (62.0)           | 43 (66.2)  |         | 43 (72.9)           | 45 (70.3)   |         |
| Female                         | 27 (38.0)           | 22 (33.8)  |         | 16 (27.1)           | 19 (29.7)   |         |
| <b>ECOG performance status</b> |                     |            | 0.832   |                     |             | 0.972   |
| 0                              | 58 (81.7)           | 54 (83.1)  |         | 49 (83.1)           | 53 (82.8)   |         |
| 1                              | 13 (18.3)           | 11 (16.9)  |         | 10 (16.9)           | 11 (17.2)   |         |
| <b>Tumor location</b>          |                     |            | 0.444   |                     |             | 0.181   |
| Upper                          | 0 (0.0)             | 0 (0.0)    |         | 27 (45.8)           | 21 (32.8)   |         |
| Middle                         | 5 (7.0)             | 7 (10.8)   |         | 26 (44.1)           | 30 (46.9)   |         |
| Lower                          | 66 (93.0)           | 58 (89.2)  |         | 6 (10.2)            | 13 (20.3)   |         |
| <b>Reconstruction</b>          |                     |            | 0.121   |                     |             | -       |
| Billroth I                     | 5 (7.0)             | 10 (15.4)  |         | 0 (0.0)             | 0 (0.0)     |         |
| Billroth II                    | 66 (93.0)           | 55 (84.6)  |         | 0 (0.0)             | 0 (0.0)     |         |
| Roux-en-Y                      | 0 (0.0)             | 0 (0.0)    |         | 59(100.0)           | 64(100.0)   |         |
| <b>Histology</b>               |                     |            | 0.246   |                     |             | 0.459   |
| Differentiated                 | 29 (40.8)           | 33 (50.8)  |         | 26 (44.1)           | 24 (37.5)   |         |
| Undifferentiated               | 42 (59.2)           | 32 (49.2)  |         | 33 (55.9)           | 40 (62.5)   |         |
| <b>Lymphovascular invasion</b> |                     |            | 0.881   |                     |             | 0.255   |
| Negative                       | 45 (63.4)           | 42 (64.6)  |         | 29 (49.2)           | 38 (59.4)   |         |
| Positive                       | 26 (36.6)           | 23 (35.4)  |         | 30 (50.8)           | 26 (40.6)   |         |
| <b>Size, cm</b>                |                     |            | 0.597   |                     |             | 0.260   |
| ≤4                             | 45 (63.4)           | 44 (67.7)  |         | 30 (50.8)           | 39 (60.9)   |         |
| >4                             | 26 (36.6)           | 21 (32.3)  |         | 29 (49.2)           | 25 (39.1)   |         |
| <b>cT category</b>             |                     |            | 0.642   |                     |             | 0.233   |
| cT1                            | 30 (42.3)           | 24 (36.9)  |         | 11 (18.6)           | 22 (34.4)   |         |
| cT2                            | 12 (16.9)           | 8 (12.3)   |         | 7 (11.9)            | 8 (12.5)    |         |
| cT3                            | 15 (21.1)           | 19 (29.2)  |         | 29 (49.2)           | 23 (35.9)   |         |
| cT4a                           | 14 (19.7)           | 14 (21.5)  |         | 12 (20.3)           | 11 (17.2)   |         |
| <b>cN category</b>             |                     |            | 0.982   |                     |             | 0.242   |
| cN0                            | 34 (47.9)           | 31 (47.7)  |         | 18 (30.5)           | 26 (40.6)   |         |
| cN+                            | 37 (52.1)           | 34 (52.3)  |         | 41 (69.5)           | 38 (59.4)   |         |
| <b>pT category</b>             |                     |            | 0.819   |                     |             | 0.070   |
| pT1                            | 32 (45.1)           | 27 (41.5)  |         | 7 (11.9)            | 20 (31.3)   |         |
| pT2                            | 9 (12.7)            | 6 (9.2)    |         | 10 (16.9)           | 7 (10.9)    |         |
| pT3                            | 19 (26.8)           | 19 (29.2)  |         | 29 (49.2)           | 24 (37.5)   |         |
| pT4a                           | 11 (15.5)           | 13 (20.0)  |         | 13 (22.0)           | 13 (20.3)   |         |

|                              |           |           |       |           |           |
|------------------------------|-----------|-----------|-------|-----------|-----------|
| <b>pN category</b>           |           |           | 0.949 |           | 0.545     |
| pN0                          | 35 (49.3) | 31 (47.7) |       | 17 (28.8) | 27 (42.2) |
| pN1                          | 12 (16.9) | 14 (21.5) |       | 15 (25.4) | 10 (15.6) |
| pN2                          | 11 (15.5) | 8 (12.3)  |       | 12 (20.3) | 12 (18.8) |
| pN3a                         | 8 (11.3)  | 8 (12.3)  |       | 12 (20.3) | 12 (18.8) |
| pN3b                         | 5 (7.0)   | 4 (6.2)   |       | 3 (5.1)   | 3 (4.7)   |
| <b>AJCC 8th pTNM staging</b> |           |           | 0.231 |           | 0.091     |
| I                            | 35 (49.3) | 26 (40.0) |       | 11 (18.6) | 23 (35.9) |
| II                           | 13 (18.3) | 20 (30.8) |       | 21 (35.6) | 16 (25.0) |
| III                          | 23 (32.4) | 19 (29.2) |       | 27 (45.8) | 25 (39.1) |
| <b>CEA, ng/ml</b>            |           |           | 0.237 |           | 0.997     |
| <5                           | 63 (88.7) | 53 (81.5) |       | 47 (79.7) | 51 (79.7) |
| ≥5                           | 8 (11.3)  | 12 (18.5) |       | 12 (20.3) | 13 (20.3) |
| <b>CA19-9, U/ml</b>          |           |           | 0.650 |           | 0.239     |
| <37                          | 63 (88.7) | 56 (86.2) |       | 47 (79.7) | 56 (87.5) |
| ≥37                          | 8 (11.3)  | 9 (13.8)  |       | 12 (20.3) | 8 (12.5)  |
| <b>CA72-4, U/ml</b>          |           |           | 0.611 |           | 0.717     |
| <6.9                         | 68 (95.8) | 61 (93.8) |       | 52 (88.1) | 55 (85.9) |
| ≥6.9                         | 3 (4.2)   | 4 (6.2)   |       | 7 (11.9)  | 9 (14.1)  |
| <b>AFP, ng/ml</b>            |           |           | 0.950 |           | 0.350     |
| <20                          | 70 (98.6) | 64 (98.5) |       | 58 (98.3) | 61 (95.3) |
| ≥20                          | 1 (1.4)   | 1 (1.5)   |       | 1 (1.7)   | 3 (4.7)   |
| <b>CA125, U/ml</b>           |           |           | 0.950 |           | 0.934     |
| <35                          | 70 (98.6) | 64 (98.5) |       | 57 (96.6) | 62 (96.9) |
| ≥35                          | 1 (1.4)   | 1 (1.5)   |       | 2 (3.4)   | 2 (3.1)   |

**Abbreviations:** AJCC, American Joint Committee on Cancer; BMI, body mass index (calculated as weight in kilograms divided by height in meters squared); ECOG, Eastern Cooperative Oncology; LN, lymph node; CEA, Carcinoembryonic antigen; CA199, Carbohydrate antigen 19-9. CA72-4, Carbohydrate antigen 72-4; AFP, Alpha fetoprotein; CA125, Carbohydrate antigen 125; SMA, submucosa approach; SSA, subserosa approach; SD, standard deviation.

**eTable 5. Number of Retrieved Lymph Nodes in the SMA and SSA Groups According to the D Station**

| Variable                                    | All patients   |                |          | Total gastrectomy |               |          | Distal gastrectomy |               |          |
|---------------------------------------------|----------------|----------------|----------|-------------------|---------------|----------|--------------------|---------------|----------|
|                                             | Mean. (SD)     |                |          | Mean (SD)         |               |          | Mean (SD)          |               |          |
|                                             | SMA<br>(n=130) | SSA<br>(n=129) | <i>P</i> | SMA<br>(n=59)     | SSA<br>(n=64) | <i>P</i> | SMA<br>(n=71)      | SSA<br>(n=65) | <i>P</i> |
| Metastatic lymph nodes of D1 station        | 3.3 (5.5)      | 2.9 (4.8)      | 0.569    | 3.8 (5.8)         | 3.3 (5.2)     | 0.393    | 2.8 (5.2)          | 2.5 (4.4)     | 0.989    |
| Number of D1 station lymph nodes retrieved  | 32.8 (12.0)    | 32.5 (11.5)    | 0.860    | 35.4 (13.7)       | 34.3 (12.2)   | 0.960    | 30.6 (10.0)        | 30.7 (10.5)   | 0.889    |
| Metastatic lymph nodes of D1+ station       | 0.5 (1.3)      | 0.6 (2.2)      | 0.334    | 0.6 (1.0)         | 0.8 (2.9)     | 0.267    | 0.5 (1.5)          | 0.4 (0.9)     | 0.740    |
| Number of D1+ station lymph nodes retrieved | 10.5 (5.3)     | 10.6 (5.0)     | 0.667    | 11.1 (5.3)        | 11.3 (5.3)    | 0.770    | 9.9 (5.3)          | 9.9 (4.6)     | 0.836    |
| Metastatic lymph nodes of D2 station        | 0.3 (0.8)      | 0.2 (0.8)      | 0.724    | 0.1 (0.4)         | 0.1 (0.4)     | 0.883    | 0.4 (1.0)          | 0.3 (1.0)     | 0.807    |
| Number of D2 station lymph nodes retrieved  | 5.9 (4.8)      | 5.0 (3.8)      | 0.281    | 3.3 (2.9)         | 3.6 (2.8)     | 0.509    | 8.0 (5.0)          | 6.4 (4.1)     | 0.056    |

D1 stations (No. 1, 2, 3, 4sb, 4d, 4sa, 5, 6, and 7 for total gastrectomy; No. 1, 3, 4sb, 4d, 5, 6, and 7 for distal gastrectomy)

D1+ stations (No. 8a, 9 and 11p for total gastrectomy; No. 8a and 9 for distal gastrectomy)

D2 stations (No. 11d and 12a for total gastrectomy; No. 11p and 12a for distal gastrectomy)

**eTable 6. Extent of Lymph Node Compliance in the SMA and SSA Groups**

| Variable                                       | No. (%)   |           | <i>P Value</i> |
|------------------------------------------------|-----------|-----------|----------------|
|                                                | SMA       | SSA       |                |
| <b>All patients</b>                            |           |           |                |
| Compliance ( $\leq 1$ ) <sup>a</sup>           | 88 (67.7) | 86 (66.7) |                |
| Non-compliance ( $\geq 2$ ) <sup>a</sup>       | 42 (32.3) | 43 (33.3) | 0.860          |
| Minor non-compliance (2) <sup>a</sup>          | 24 (18.5) | 20 (15.5) | 0.640          |
| Major non-compliance ( $\geq 3$ ) <sup>a</sup> | 18 (13.8) | 23 (17.8) | 0.380          |
| 3                                              | 9 (6.9)   | 17 (13.2) | 0.142          |
| $\geq 4$                                       | 9 (6.9)   | 6 (4.7)   | 0.605          |
| <b>Distal gastrectomy</b>                      |           |           |                |
| Compliance ( $\leq 1$ ) <sup>a</sup>           | 52 (73.2) | 47 (72.3) |                |
| Non-compliance ( $\geq 2$ ) <sup>a</sup>       | 19 (26.8) | 18 (27.7) | 0.903          |
| Minor non-compliance (2) <sup>a</sup>          | 14 (19.7) | 11 (16.9) | 0.842          |
| Major non-compliance ( $\geq 3$ ) <sup>a</sup> | 5 (7.0)   | 7 (10.8)  | 0.643          |
| 3                                              | 4 (5.6)   | 5 (7.7)   | 0.891          |
| $\geq 4$                                       | 1 (1.4)   | 2 (3.1)   | 0.938          |
| <b>Total gastrectomy</b>                       |           |           |                |
| Compliance ( $\leq 1$ ) <sup>a</sup>           | 36 (61.0) | 39 (60.9) |                |
| Non-compliance ( $\geq 2$ ) <sup>a</sup>       | 23 (39.0) | 25 (39.1) | 0.993          |
| Minor non-compliance (2) <sup>a</sup>          | 10 (16.9) | 9 (14.1)  | 0.847          |
| Major non-compliance ( $\geq 3$ ) <sup>a</sup> | 13 (22.0) | 16 (25.0) | 0.699          |
| 3                                              | 5 (8.5)   | 12 (18.8) | 0.165          |
| $\geq 4$                                       | 8 (13.6)  | 4 (6.3)   | 0.289          |

<sup>a</sup> Number of nodes not removed. SMA, submucosa approach; SSA, subserosa approach.



**eTable 7. Number of Metastatic Lymph Nodes in the SMA and SSA Groups**

| Metastatic<br>LNs | All patients   |                |          | Total gastrectomy |               |          | Distal gastrectomy |               |          |
|-------------------|----------------|----------------|----------|-------------------|---------------|----------|--------------------|---------------|----------|
|                   | Mean (SD)      |                | <i>P</i> | Mean (SD)         |               | <i>P</i> | Mean (SD)          |               | <i>P</i> |
|                   | SMA<br>(n=130) | SSA<br>(n=129) |          | SMA<br>(n=59)     | SSA<br>(n=64) |          | SMA<br>(n=71)      | SSA<br>(n=65) |          |
| Total             | 4.1 (6.8)      | 3.8 (6.8)      | 0.709    | 4.6 (6.6)         | 4.3 (8.0)     | 0.832    | 3.7 (7.0)          | 3.3 (5.5)     | 0.695    |
| NO.1              | 0.2 (0.5)      | 0.1 (0.3)      | 0.070    | 0.1 (0.3)         | 0.1 (0.3)     | 0.912    | 0.2 (0.6)          | 0.0 (0.2)     | 0.057    |
| NO.2              | 0.0 (0.2)      | 0.1 (0.6)      | 0.369    | 0.1 (0.4)         | 0.2 (0.9)     | 0.425    | 0.0 (0.0)          | 0.0 (0.0)     | NA       |
| NO.3              | 1.4 (2.7)      | 1.2 (2.2)      | 0.453    | 2.2 (3.4)         | 1.5 (2.3)     | 0.146    | 0.7 (1.8)          | 0.9 (2.1)     | 0.626    |
| NO.4              | 0.7 (1.6)      | 0.7 (1.8)      | 0.961    | 0.6 (1.4)         | 1.0 (2.3)     | 0.310    | 0.7 (1.7)          | 0.4 (0.9)     | 0.131    |
| NO.4sa            | 0.0 (0.2)      | 0.0 (0.1)      | 0.416    | 0.1 (0.3)         | 0.0 (0.2)     | 0.351    | 0.0 (0.0)          | 0.0 (0.0)     | NA       |
| NO.4sb            | 0.1 (0.2)      | 0.1 (0.3)      | 0.990    | 0.1 (0.3)         | 0.1 (0.5)     | 0.754    | 0.0 (0.2)          | 0.0 (0.0)     | 0.175    |
| NO.4d             | 0.6 (1.5)      | 0.6 (1.5)      | 0.980    | 0.5 (1.2)         | 0.8 (2.0)     | 0.213    | 0.7 (1.7)          | 0.4 (0.9)     | 0.152    |
| NO.5              | 0.2 (0.7)      | 0.2 (0.6)      | 0.522    | 0.1 (0.3)         | 0.1 (0.4)     | 0.700    | 0.3 (0.9)          | 0.3 (0.7)     | 0.662    |
| NO.6              | 0.5 (1.6)      | 0.5 (1.4)      | 0.949    | 0.5 (1.9)         | 0.3 (1.1)     | 0.519    | 0.6 (1.3)          | 0.8 (1.6)     | 0.402    |
| NO.7              | 0.2 (0.7)      | 0.2 (0.5)      | 0.562    | 0.2 (0.6)         | 0.1 (0.5)     | 0.906    | 0.2 (0.8)          | 0.2 (0.5)     | 0.549    |
| NO.8a             | 0.2 (0.6)      | 0.2 (1.2)      | 0.488    | 0.2 (0.5)         | 0.3 (1.5)     | 0.598    | 0.2 (0.6)          | 0.2 (0.6)     | 0.673    |
| NO.9              | 0.3 (1.0)      | 0.2 (0.9)      | 0.703    | 0.2 (0.6)         | 0.3 (1.1)     | 0.525    | 0.4 (1.2)          | 0.2 (0.5)     | 0.253    |
| NO.11p            | 0.2 (0.6)      | 0.2 (0.7)      | 0.840    | 0.2 (0.5)         | 0.2 (0.6)     | 0.876    | 0.2 (0.7)          | 0.2 (0.8)     | 0.721    |
| NO.11d            | 0.0 (0.2)      | 0.0 (0.2)      | 0.711    | 0.1 (0.3)         | 0.0 (0.2)     | 0.620    | 0.0 (0.0)          | 0.0 (0.0)     | NA       |
| NO.12a            | 0.1 (0.5)      | 0.1 (0.3)      | 0.453    | 0.1 (0.3)         | 0.1 (0.3)     | 0.845    | 0.2 (0.6)          | 0.1 (0.3)     | 0.358    |

**Abbreviations:** SMA, submucosa approach; SSA, subserosa approach; SD, standard deviation.

**eTable 8. Validity of ICG That Emitted Fluorescence and Lymph Node Metastasis**

| Variable                                          | SMA                  |                      |                      | SSA                  |                      |                      |
|---------------------------------------------------|----------------------|----------------------|----------------------|----------------------|----------------------|----------------------|
|                                                   | All patients         | DG group             | TG group             | All patients         | DG group             | TG group             |
| <b>Sensitivity</b><br><b>(true positive rate)</b> | 62.2%<br>(333/535)   | 64.3%<br>(169/263)   | 60.3%<br>(164/272)   | 58.0%<br>(284/490)   | 56.8%<br>(121/213)   | 58.8%<br>(163/277)   |
| <b>False negative rate</b>                        | 37.8%<br>(202/535)   | 35.7%<br>(94/263)    | 39.7%<br>(108/272)   | 42.0%<br>(206/490)   | 43.2% (92/213)       | 41.2%<br>(114/277)   |
| <b>Specificity</b><br><b>(true negative rate)</b> | 48.5%<br>(2878/5940) | 45.5%<br>(1468/3226) | 52.0%<br>(1410/2714) | 41.2%<br>(2408/5851) | 41.2%<br>(1177/2857) | 41.1%<br>(1231/2994) |
| <b>False positive rate</b>                        | 51.5%<br>(3062/5940) | 54.5%<br>(1758/3226) | 48.0%<br>(1304/2714) | 58.8%<br>(3443/5851) | 58.8%<br>(1680/2857) | 58.9%<br>(1763/2994) |
| <b>Positive likelihood ratio</b>                  | 1.207                | 1.179                | 1.255                | 0.985                | 0.966                | 0.999                |
| <b>Negative likelihood ratio</b>                  | 0.779                | 0.785                | 0.764                | 1.022                | 1.048                | 1.001                |
| <b>Youden index</b>                               | 0.107                | 0.098                | 0.122                | -0.009               | -0.020               | 0.000                |
| <b>Kappa value</b>                                | 0.031                | 0.025                | 0.041                | -0.002               | -0.004               | 0.000                |

**Abbreviations:** ICG, Indocyanine green; LN, Lymph node; DG, Distal gastrectomy; TG, Total gastrectomy.

**eTable 9. Diagnostic Value of Fluorescent Lymphography for the Detection of Metastatic Stations According to the Total Number of Stations**

| Variable           | Total number of stations, n | Metastatic stations, n | Nonmetastatic stations, n | Sensitivity <sup>a</sup> | Specificity <sup>b</sup> | NPV <sup>c</sup> | PPV <sup>d</sup> |
|--------------------|-----------------------------|------------------------|---------------------------|--------------------------|--------------------------|------------------|------------------|
| <b>SMA</b>         |                             |                        |                           |                          |                          |                  |                  |
| All                |                             |                        |                           |                          |                          |                  |                  |
| Fluorescent        | 1038                        | 206 (TP)               | 832 (FP)                  | 89.6%                    | 31.2%                    | 94.0%            | 19.8%            |
| Non-fluorescent    | 402                         | 24 (FN)                | 378 (TN)                  |                          |                          |                  |                  |
| Distal gastrectomy |                             |                        |                           |                          |                          |                  |                  |
| Fluorescent        | 568                         | 111 (TP)               | 457 (FP)                  | 94.1%                    | 24.2%                    | 95.4%            | 19.5%            |
| Non-fluorescent    | 153                         | 7 (FN)                 | 146 (TN)                  |                          |                          |                  |                  |
| Total gastrectomy  |                             |                        |                           |                          |                          |                  |                  |
| Fluorescent        | 470                         | 95 (TP)                | 375 (FP)                  | 84.8%                    | 38.2%                    | 93.2%            | 20.2%            |
| Non-fluorescent    | 249                         | 17 (FN)                | 232 (TN)                  |                          |                          |                  |                  |
| <b>SSA</b>         |                             |                        |                           |                          |                          |                  |                  |
| All                |                             |                        |                           |                          |                          |                  |                  |
| Fluorescent        | 1129                        | 192 (TP)               | 937 (FP)                  | 90.1%                    | 24.3%                    | 93.5%            | 17.0%            |
| Non-fluorescent    | 322                         | 21 (FN)                | 301 (TN)                  |                          |                          |                  |                  |
| Distal gastrectomy |                             |                        |                           |                          |                          |                  |                  |
| Fluorescent        | 519                         | 87 (TP)                | 432 (FP)                  | 87.9%                    | 22.2%                    | 91.1%            | 16.8%            |
| Non-fluorescent    | 135                         | 12 (FN)                | 123 (TN)                  |                          |                          |                  |                  |
| Total gastrectomy  |                             |                        |                           |                          |                          |                  |                  |
| Fluorescent        | 610                         | 105 (TP)               | 505 (FP)                  | 92.1%                    | 26.1%                    | 95.2%            | 17.2%            |
| Non-fluorescent    | 187                         | 9 (FN)                 | 178 (TN)                  |                          |                          |                  |                  |

TP, true positive; FP, false positive; FN, false negative; TN, true negative;

<sup>a</sup> Sensitivity was calculated by  $[TP / (TP + FN)]$

<sup>b</sup> Specificity was calculated by  $[TN / (TN + FP)]$

<sup>c</sup> NPV, negative predictive value was calculated by  $[TN / (TN + FN)]$

<sup>d</sup> PPV, positive predictive value was calculated by  $[TP / (TP + FP)]$

**eTable 10. Surgical Outcomes, Postoperative Recovery, Morbidity, and Mortality in Patients in the SMA and SSA Groups Who Underwent Distal Gastrectomy or Total Gastrectomy**

| Outcome                               | Distal gastrectomy  |               |            | Total gastrectomy   |               |            |
|---------------------------------------|---------------------|---------------|------------|---------------------|---------------|------------|
|                                       | Mean (SD) / No. (%) |               | P<br>Value | Mean (SD) / No. (%) |               | P<br>Value |
|                                       | SMA<br>(n=71)       | SSA<br>(n=65) |            | SMA<br>(n=59)       | SSA<br>(n=64) |            |
| <b>Surgical outcome</b>               |                     |               |            |                     |               |            |
| Estimated blood loss (mL)             | 47.3 (46.3)         | 47.7 (55.9)   | 0.960      | 55.8 (46.1)         | 57.3 (63.3)   | 0.882      |
| Surgical time (minutes)               | 189.1 (40.7)        | 197.5 (51.0)  | 0.287      | 207.7 (45.4)        | 216.7 (51.8)  | 0.306      |
| <b>Postoperative recovery</b>         |                     |               |            |                     |               |            |
| Time to first flatus (days)           | 3.1 (0.9)           | 3.3 (0.7)     | 0.109      | 3.2 (1.4)           | 3.3 (0.7)     | 0.634      |
| Time to ambulation (days)             | 2.1 (0.5)           | 2.1 (0.5)     | 0.825      | 2.2 (0.7)           | 2.3 (1.5)     | 0.507      |
| Time to first liquid intake (days)    | 3.5 (0.8)           | 3.6 (0.9)     | 0.163      | 3.7 (1.2)           | 3.9 (1.6)     | 0.520      |
| Time to first semifluid intake (days) | 5.1 (0.5)           | 5.7 (5.1)     | 0.307      | 6.0 (2.8)           | 5.7 (2.5)     | 0.489      |
| Postoperative hospital stays (days)   | 7.1 (2.1)           | 7.6 (6.3)     | 0.537      | 9.7 (6.9)           | 8.9 (4.7)     | 0.457      |
| Postoperative transfusion             | 4 (5.6)             | 3 (4.6)       | 0.788      | 5 (8.5)             | 4 (6.3)       | 0.636      |
| Reoperation <sup>a</sup>              | 1 (1.4)             | 0 (0.0)       | 0.337      | 0 (0.0)             | 0 (0.0)       | -          |
| Unplanned readmission <sup>b</sup>    | 0 (0.0)             | 1 (1.5)       | 0.294      | 1 (1.7)             | 2 (3.1)       | 0.607      |
| <b>Morbidity type</b>                 |                     |               |            |                     |               |            |
| Postoperative complication            | 10 (14.1)           | 11 (16.9)     | 0.647      | 13 (22.0)           | 10 (15.6)     | 0.362      |
| Clavien-Dindo classification          |                     |               | 0.516      |                     |               | 0.767      |
| I                                     | 0 (0.0)             | 2 (3.1)       |            | 1 (1.7)             | 0 (0.0)       |            |
| II                                    | 8 (11.3)            | 7 (10.8)      |            | 9 (15.3)            | 8 (12.5)      |            |
| IIIa                                  | 1 (1.4)             | 1 (1.5)       |            | 2 (3.4)             | 1 (1.6)       |            |
| IIIb                                  | 1 (1.4)             | 0 (0.0)       |            | 0 (0.0)             | 0 (0.0)       |            |
| IV                                    | 0 (0.0)             | 1 (1.5)       |            | 1 (1.7)             | 1 (1.6)       |            |
| V                                     | 0 (0.0)             | 0 (0.0)       |            | 0 (0.0)             | 0 (0.0)       |            |

**Abbreviations:** LN, lymph node; SMA, submucosa approach; SSA, subserosa approach; SD, standard deviation.

<sup>a</sup> Due to one case of postoperative intra-abdominal hemorrhage in the SMA group.

<sup>b</sup> Due to one case of anastomotic stenosis in the SSA group underwent distal gastrectomy, one case of postoperative abdominal infection and one case of postoperative ileus in the SSA group underwent total gastrectomy; one case of postoperative abdominal infection in the SMA group underwent total gastrectomy.

**eTable 11. Cost Difference Between the SMA and SSA Groups**

| Variable                                    | All patients   |                 |         | Distal gastrectomy |                |         | Total gastrectomy |                  |         |
|---------------------------------------------|----------------|-----------------|---------|--------------------|----------------|---------|-------------------|------------------|---------|
|                                             | Mean (SD)      |                 | P Value | Mean (SD)          |                | P Value | Mean (SD)         |                  | P Value |
|                                             | SMA (n=130)    | SSA (n=129)     |         | SMA (n=71)         | SSA (n=65)     |         | SMA (n=59)        | SSA (n=64)       |         |
| <b>Total cost (\$)</b>                      | 9860.3 (970.0) | 9640.6 (1276.2) | 0.120   | 9440.8 (822.2)     | 9231.3 (790.3) | 0.133   | 10365.2 (895.5)   | 10056.4 (1525.1) | 0.178   |
| <b>Total indirect cost (\$)<sup>a</sup></b> | 935.7 (244.2)  | 925.1 (321.2)   | 0.765   | 818.7 (212.8)      | 800.1 (328.7)  | 0.693   | 1076.5 (202.7)    | 1052.1 (259.6)   | 0.564   |
| <b>Total direct cost (\$)</b>               | 8924.6 (913.5) | 8715.5 (1180.6) | 0.112   | 8622.1 (832.1)     | 8431.2 (739.6) | 0.161   | 9288.7 (879.6)    | 9004.3 (1451.9)  | 0.196   |
| Hospitalization (\$)                        | 252.9 (51.5)   | 244.9 (67.4)    | 0.284   | 231.3 (45.3)       | 222.7 (73.2)   | 0.406   | 278.8 (46.5)      | 267.4 (52.6)     | 0.206   |
| Surgical cost (\$)                          | 1416.2 (346.9) | 1396.7 (469.6)  | 0.704   | 1289.2 (308.7)     | 1254.3 (340.2) | 0.532   | 1469.0 (330.3)    | 1441.2 (537.0)   | 0.733   |
| Laboratory test (\$)                        | 426.4 (101.3)  | 413.5 (109.3)   | 0.325   | 378.5 (82.9)       | 364.3 (82.1)   | 0.320   | 484.2 (91.1)      | 463.5 (111.4)    | 0.265   |
| Radiology test (\$)                         | 1092.0 (248.9) | 1111.3 (248.4)  | 0.533   | 993.2 (231.0)      | 1005.6 (218.9) | 0.749   | 1210.9 (216.9)    | 1218.6 (231.2)   | 0.849   |
| Medication and injections (\$)              | 2389.4 (569.3) | 2474.5 (813.5)  | 0.330   | 2074.9 (447.0)     | 2152.4 (424.5) | 0.303   | 2767.9 (461.5)    | 2801.6 (972.5)   | 0.809   |
| Fluorescence related fees (\$) <sup>b</sup> | 335.3 (5.5)    | 182.4 (4.4)     | <0.001  | 335.2 (6.1)        | 183.0 (4.8)    | <0.001  | 335.4 (4.7)       | 181.9 (4.0)      | <0.001  |
| Others (\$)                                 | 3012.4 (721.4) | 2892.2 (835.2)  | 0.216   | 3319.8 (624.9)     | 3248.8 (695.0) | 0.532   | 2642.5 (656.6)    | 2530.0 (813.6)   | 0.403   |

Exchange Rate Calculation 1 US dollar = 6.5751 RMB, Date 20/11/2020

**Abbreviations:** SMA, submucosa approach; SSA, subserosa approach; SD, Standard deviation.

<sup>a</sup> Including overhead cost of the building, the amortization of capital equipment, and supplies, maintenance of services, utilities and administrative staff.

<sup>b</sup> The fluorescence-related cost for the SMA included the cost of endoscopy, tracers, materials, and treatment, while that for the SSA included the cost of tracers, materials, and treatment.

**eTable 12. Descriptive Statistics of In-patient Satisfaction Scales**

| Scales | Mean. (SD)  |             | P Value | n (%) floor |             | n (%) ceiling |             |
|--------|-------------|-------------|---------|-------------|-------------|---------------|-------------|
|        | SMA (n=130) | SSA (n=129) |         | SMA (n=130) | SSA (n=129) | SMA (n=130)   | SSA (n=129) |
| SATDTS | 76.8 (18.4) | 76.4 (18.5) | 0.884   | 1 (0.8)     | 1 (0.8)     | 30 (23.1)     | 31 (24.0)   |
| SATDIS | 78.5 (21.8) | 79.4 (20.6) | 0.728   | 4 (3.1)     | 2 (1.6)     | 47 (36.2)     | 50 (38.8)   |
| SATDIP | 70.5 (23.9) | 69.8 (23.5) | 0.814   | 2 (1.5)     | 1 (0.8)     | 37 (28.5)     | 34 (26.4)   |
| SATDAV | 67.7 (22.6) | 67.4 (22.6) | 0.907   | 4 (3.1)     | 4 (3.1)     | 21 (16.2)     | 20 (15.5)   |
| SATOTH | 67.5 (19.4) | 68.5 (19.9) | 0.701   | 1 (0.8)     | 0 (0.0)     | 19 (14.6)     | 19 (14.7)   |
| SATWAI | 65.4 (19.2) | 66.8 (21.0) | 0.566   | 3 (2.3)     | 2 (1.6)     | 8 (6.2)       | 15 (11.6)   |
| SATCSI | 63.2 (18.7) | 72.8 (19.1) | <0.001  | 5 (3.8)     | 2 (1.6)     | 7 (5.4)       | 16 (12.4)   |
| SATGEN | 70.5 (24.3) | 76.1 (21.5) | 0.048   | 1 (0.8)     | 0 (0.0)     | 40 (30.8)     | 43 (33.3)   |

% floor = percentage of respondents at lowest scale rating. % ceiling = percentage of respondents at highest scale rating.

Modified EORTC IN-PATSAT14 scales (high score = high satisfaction rating): SATDTS = doctor's technical skills, SATDIS = doctor's interpersonal skills, SATDIP = doctor's information provision, SATDAV = doctor's availability, SATOTH = other personal interpersonal skills and information provision, SATWAI = waiting time, SATCSI = comfort special-item, SATGEN = overall quality rating.

Abbreviations: SMA, submucosa approach; SSA, subserosa approach; SD, Standard deviation.

**eTable 13. Comparison of the Mean Surg-TLX Subscales Between the SMA and SSA Groups**

| Variable           | Mean (SD)   |             | P Value |
|--------------------|-------------|-------------|---------|
|                    | SMA (n=130) | SSA (n=129) |         |
| Distractions       | 4.3 (1.4)   | 4.3 (1.4)   | 0.776   |
| Situational Stress | 4.8 (1.7)   | 4.7 (1.9)   | 0.910   |
| Task Complexity    | 6.9 (2.9)   | 6.9 (2.8)   | 0.863   |
| Temporal Demands   | 5.1 (1.9)   | 5.0 (1.9)   | 0.554   |
| Physical Demands   | 8.5 (3.4)   | 8.6 (3.3)   | 0.791   |
| Mental Demands     | 6.9 (3.4)   | 7.0 (3.4)   | 0.812   |
| Total              | 36.4 (7.2)  | 36.6 (7.3)  | 0.861   |

**Abbreviations:** SMA, submucosa approach; SSA, subserosa approach; SD, Standard deviation.
