# Supplementary material for: Comparison of submucosal and subserosal approaches toward optimized indocyanine green tracer-guided laparoscopic lymphadenectomy for patients with gastric cancer (FUGES-019): a randomized controlled trial
Source: Springer Nature journal article supplement (doi:10.1186/s12916-021-02125-y), 2021-10-27
Supplement: MOESM3 [file 19803698]

**Supplemental Content 3. eFigures**

**eFigure 1.** Illustration of Six Points for Subserosal Injection of ICG

A. Distal gastrectomy. B. Total gastrectomy.

**eFigure 2.** The Surg-TLX Questionnaire

**eFigure 3.** View of Lymph Nodes Under Near-Infrared Fluorescent Imaging After Subserosal Injection of ICG

A. Green fluorescence. B. Near-Infrared imaging. C. Color-Segmented fluorescence.

**eFigure 4.** Mean Number of Fluorescent Lymph Nodes, Nonfluorescent Lymph Nodes in Fluorescent Stations, and Lymph Nodes in Nonfluorescent Stations According to the Lymph Node Station in the SMA and SSA Groups

<sup>a</sup> $P < .05$ , <sup>b</sup> $P < .001$ .

**eFigure 5.** Mean Number of Fluorescent Lymph Nodes and Nonfluorescent Lymph Nodes in Fluorescent Stations According to the Lymph Node Station in the SMA and SSA Groups.

**eFigure 6.** Lymph Node Dissection Rate at Each Station in the SMA and SSA Groups During Distal and Total Gastrectomy with D2 Lymph Node Dissection

A. Distal gastrectomy with D2 lymph node dissection. B. Total gastrectomy with D2 lymph node dissection. C. Noncompliance with lymph node dissection in the SMA group is shown in dark blue text and that in the SSA group is shown in gray text. SMA, submucosa approach; SSA, subserosa approach.

**eFigure 7.** Laboratory Findings Estimated Before Surgery and on Postoperative Days 1, 3, and 5.

(A) White blood cell count, (B) hemoglobin level, (C) platelet count, (D) total bilirubin level, and (E) albumin level.

**eFigure 8.** Total Number of Retrieved Lymph Nodes in the SMA, SSA and Non-ICG Groups

SMA, submucosa approach; SSA, subserosa approach.

**eFigure 9.** The Lymphatic System in the Gastric Wall. A, submucous plexus; B, lymphatic vessels among the muscular fibers; C, subserous plexus. LYVE1 indicates lymphatic vessels, CD31 indicates blood vessels,  $\alpha$ -SMA indicates smooth muscle. Abbreviations: LMM: lamina muscularis mucosae. The yellow arrow represents lymphatic vessels. Scale bar:100um

**A** Distal gastrectomy

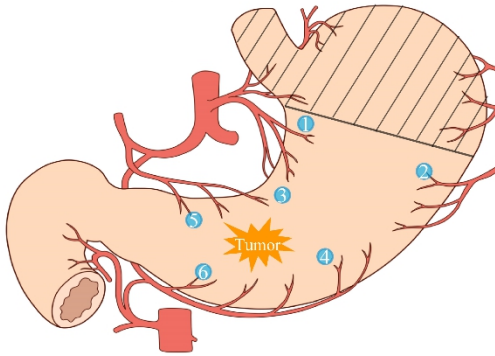

- ① between the 1st and the 2nd gastric wall branches of the left gastric artery
- ② the 1st gastric wall branch of the left gastroepiploic artery
- ③ the gastric angular notch
- ④ the midpoint of two injection points (② and ⑥) in the greater curvature
- ⑤ the 1st gastric wall branch of the right gastric artery
- ⑥ the 1st gastric wall branch of the right gastroepiploic artery

**B** Total gastrectomy

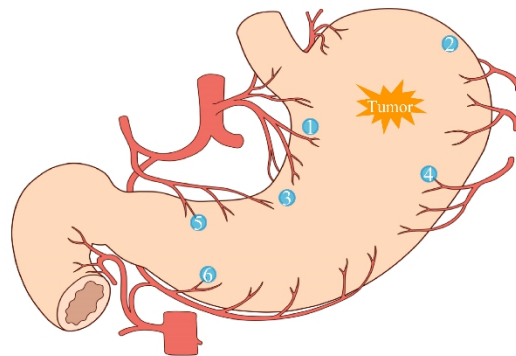

- ① between the 1st and the 2nd gastric wall branches of the left gastric artery
- ② the junction area between fundus and body in the greater curvature
- ③ the gastric angular notch
- ④ the 1st gastric wall branch of the left gastroepiploic artery
- ⑤ the 1st gastric wall branch of the right gastric artery
- ⑥ the 1st gastric wall branch of the right gastroepiploic artery

**eFigure 1. Illustration of Six Points for Subserosal Injection of ICG**

A. Distal gastrectomy. B. Total gastrectomy.

## The SURG-TLX

There are six rating scales which are meant for evaluating your experience during the laparoscopic surgery procedure. Please evaluate the procedure by marking 'X' on each of the six scales at the point which best fits your experience. The Surg-TLX subscale items were rated on a 20-point scale (0 = low, 20 = high). Please read the descriptions carefully.

### Mental Demands

*How mentally fatiguing was the procedure?*

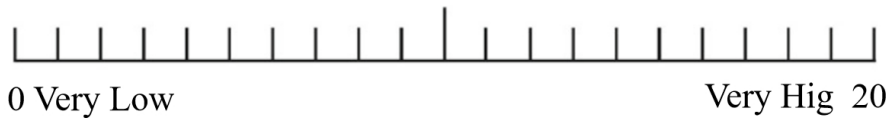

### Physical Demands

*How physically fatiguing was the procedure?*

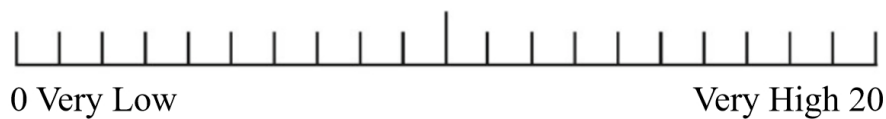

### Temporal Demands

*How hurried or rushed was the pace of the procedure?*

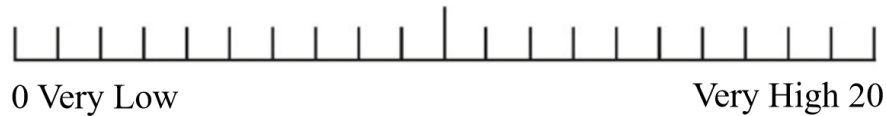

### Task Complexity

*How complex was the procedure?*

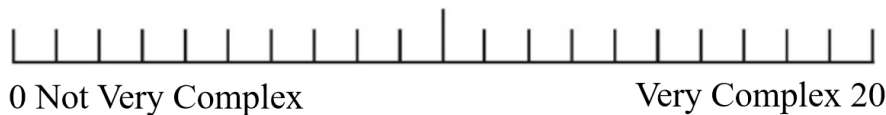

### Situational Stress

*How anxious did you feel while performing the procedure?*

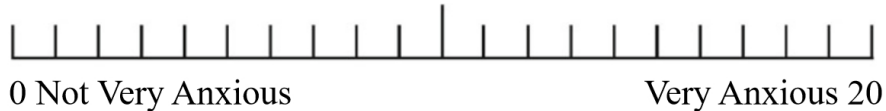

### Distractions

*How distracting was the operating environment?*

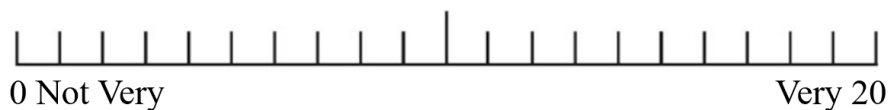

eFigure 2. The Surg-TLX Questionnaire

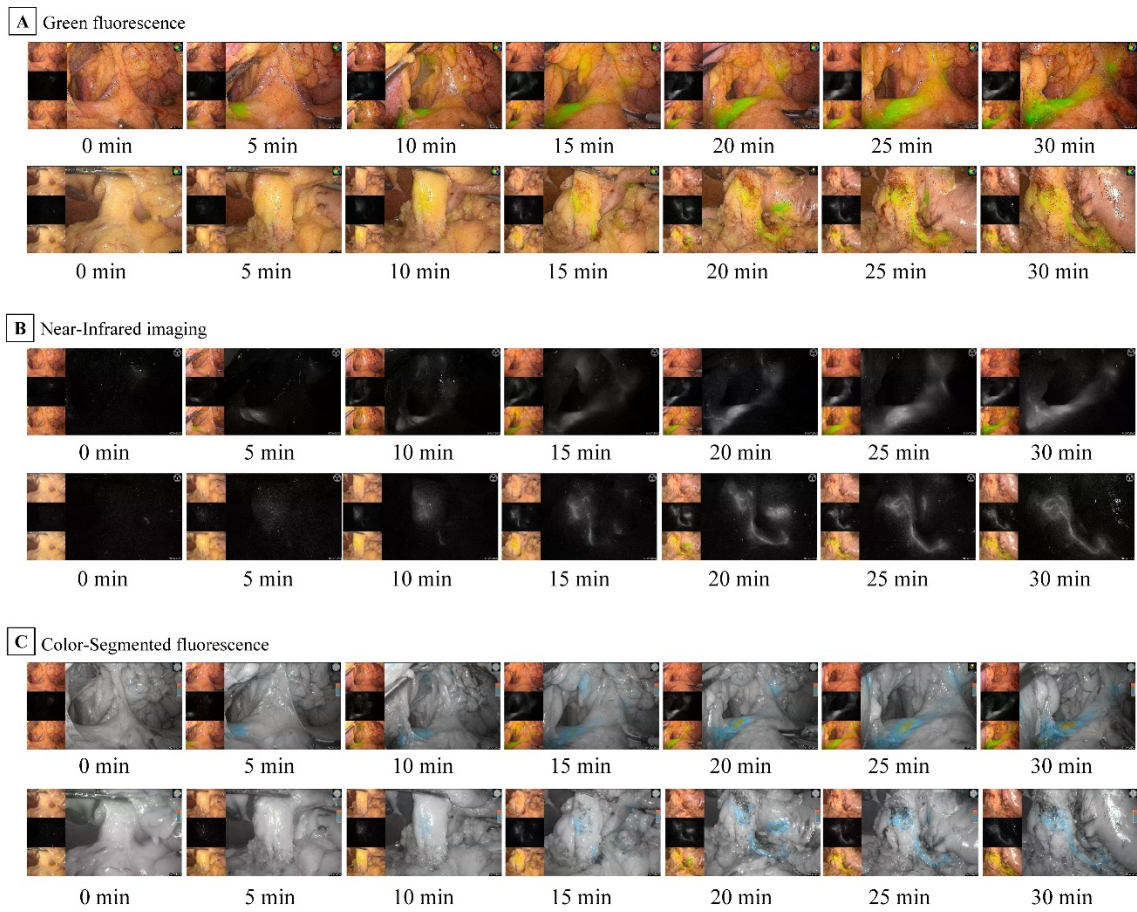

**Figure 3. View of Lymph Nodes Under Near-Infrared Fluorescent Imaging After Subserosal Injection of ICG**  
 A. Green fluorescence. B. Near-Infrared imaging. C. Color-Segmented fluorescence.

**A Distal Gastrectomy**

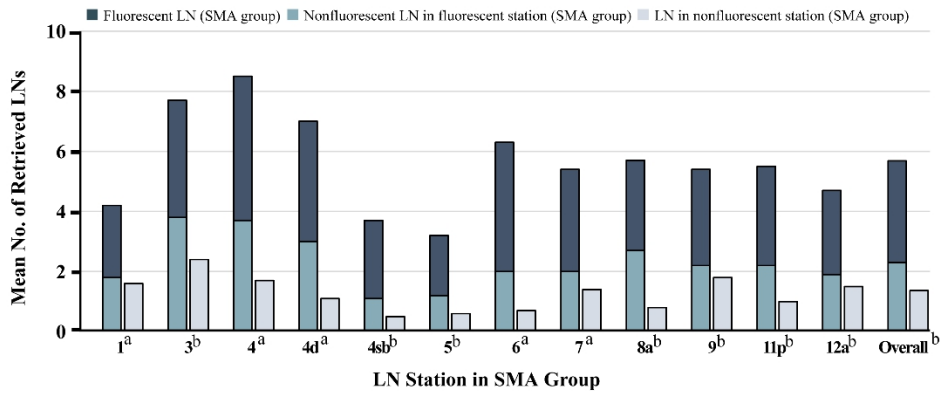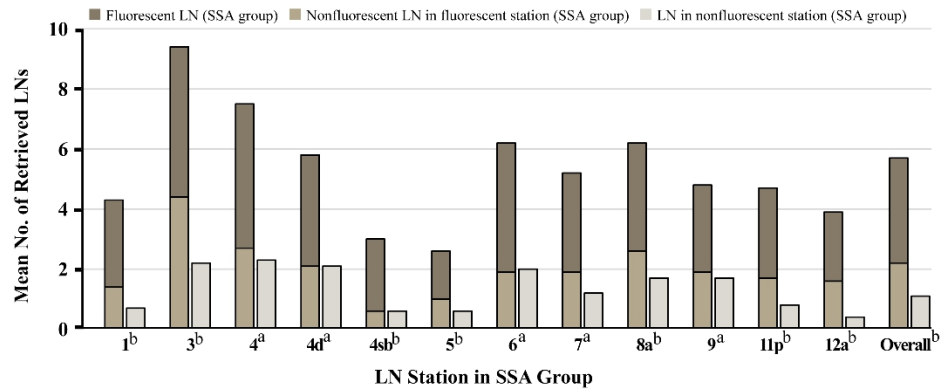

**B Total Gastrectomy**

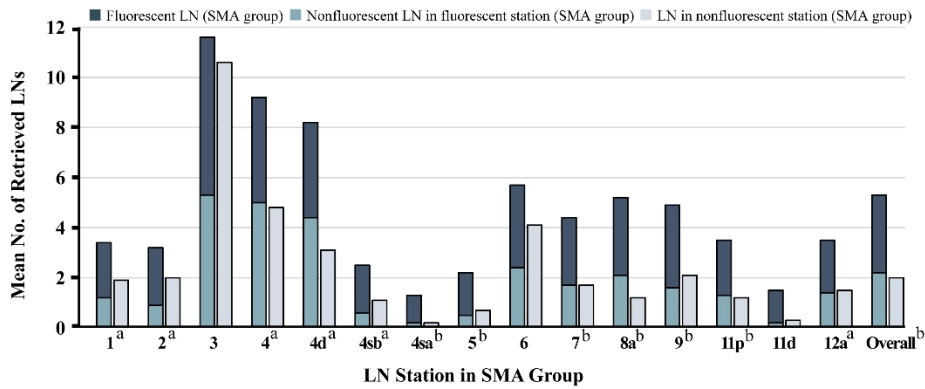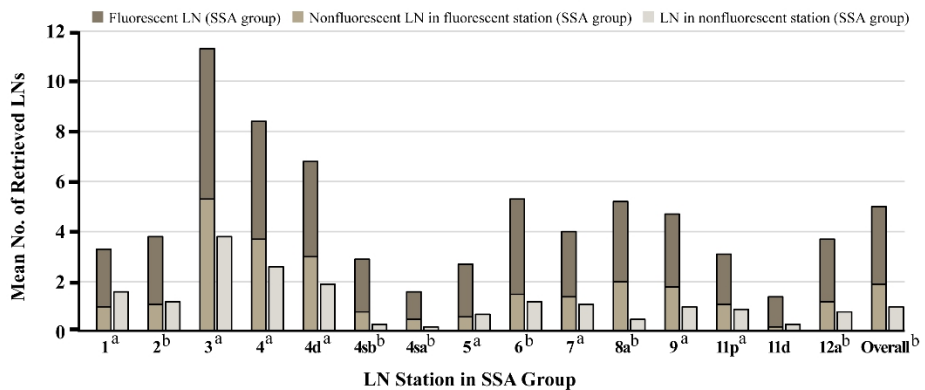

**eFigure 4. Mean Number of Fluorescent Lymph Nodes, Nonfluorescent Lymph Nodes in Fluorescent Stations, and Lymph Nodes in Nonfluorescent Stations According to the Lymph Node Station in the SMA and SSA Groups**

<sup>a</sup> $P < .05$ , <sup>b</sup> $P < .001$ .

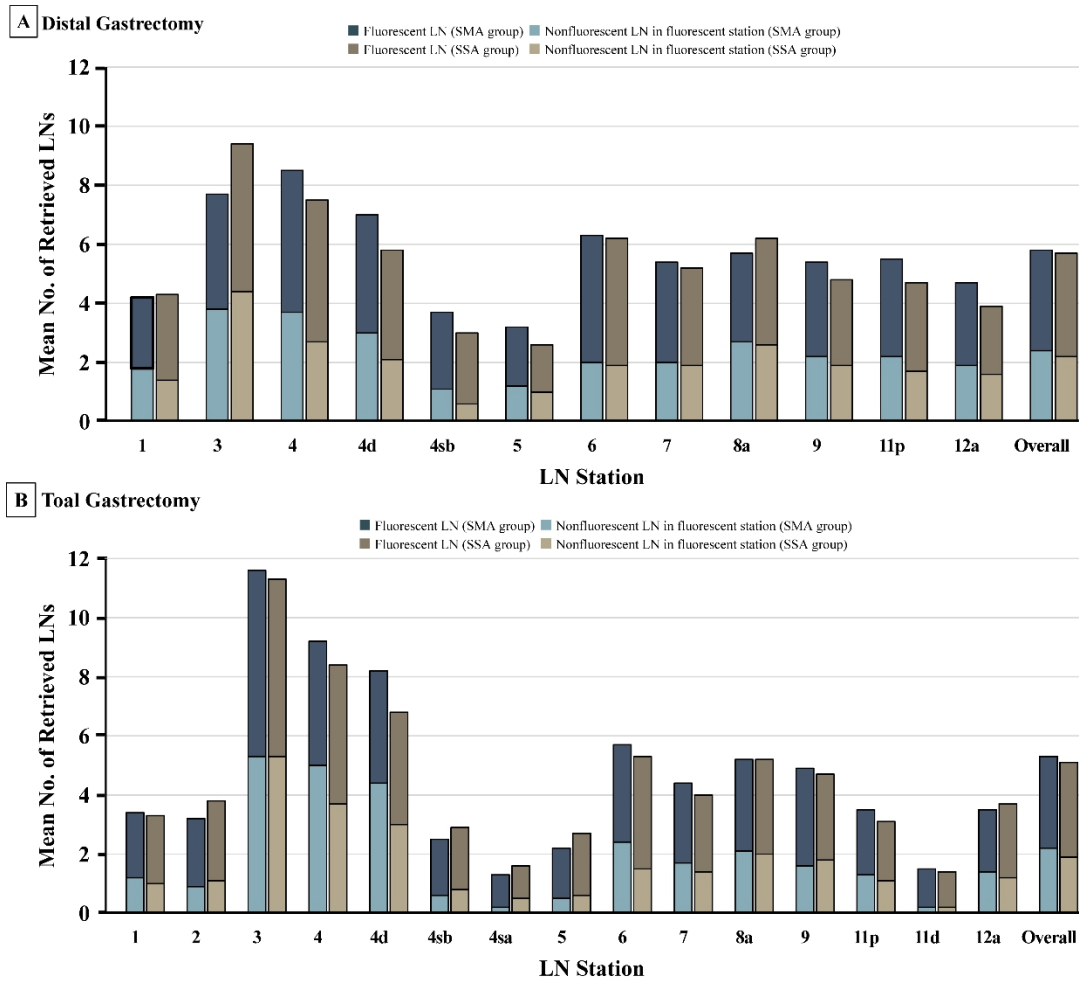

**Figure 5. Mean Number of Fluorescent Lymph Nodes and Nonfluorescent Lymph Nodes in Fluorescent Stations According to the Lymph Node Station in the SMA and SSA Groups**

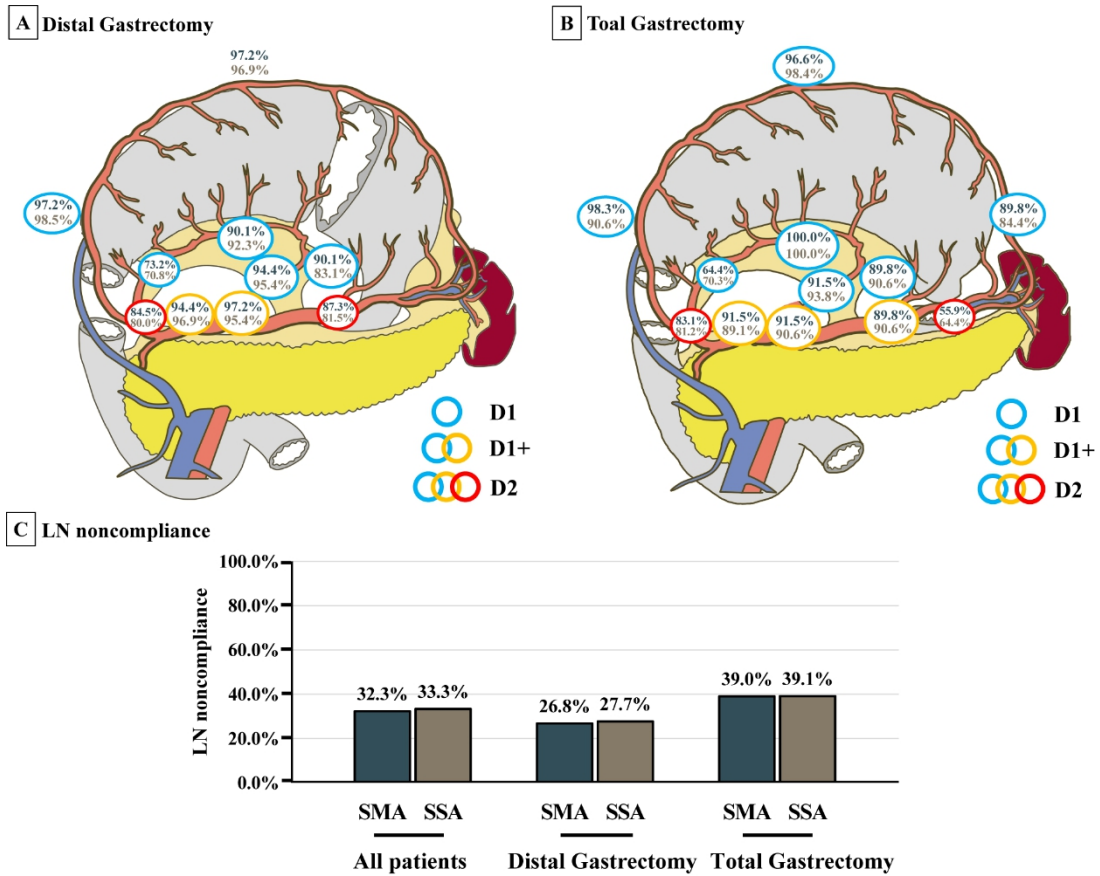

**eFigure 6.** Lymph Node Dissection Rate at Each Station in the SMA and SSA Groups During Distal and Total Gastrectomy with D2 Lymph Node Dissection

A. Distal gastrectomy with D2 lymph node dissection. B. Total gastrectomy with D2 lymph node dissection. C. Noncompliance with lymph node dissection in the SMA group is shown in dark blue text and that in the SSA group is shown in gray text. SMA, submucosa approach; SSA, subserosa approach.



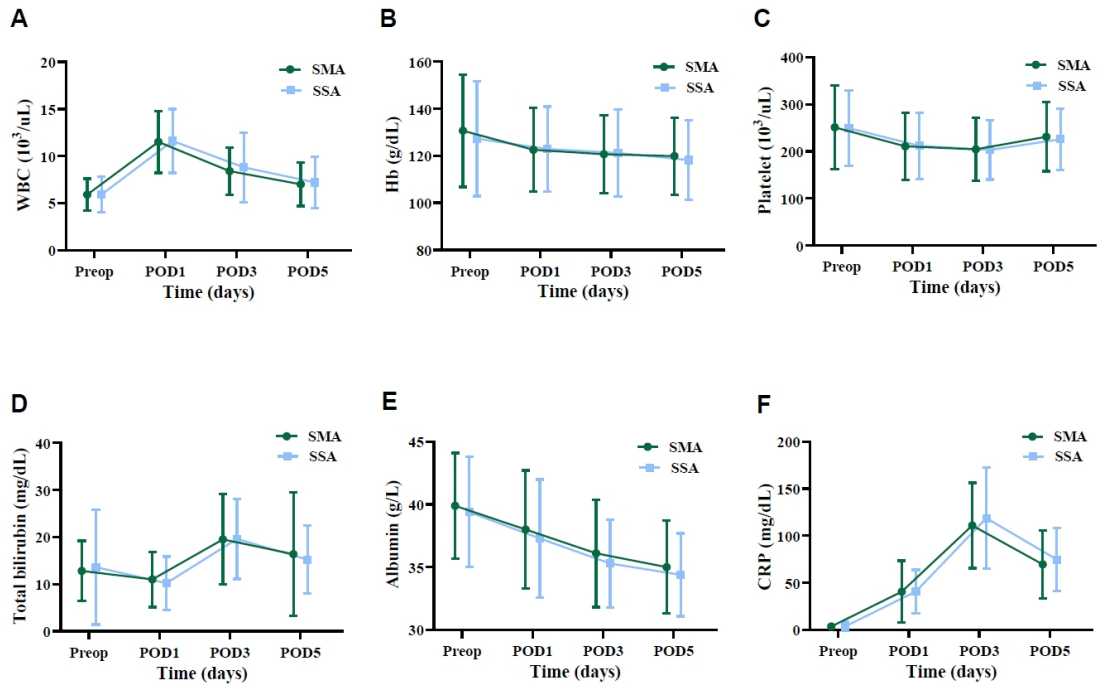

**Figure 7. Laboratory Findings Estimated Before Surgery and on Postoperative Days 1, 3, and 5.**

(A) White blood cell (WBC) count, (B) hemoglobin (Hb) level, (C) platelet count, (D) total bilirubin level, (E) albumin level, and (F) C-reactive protein (CRP).

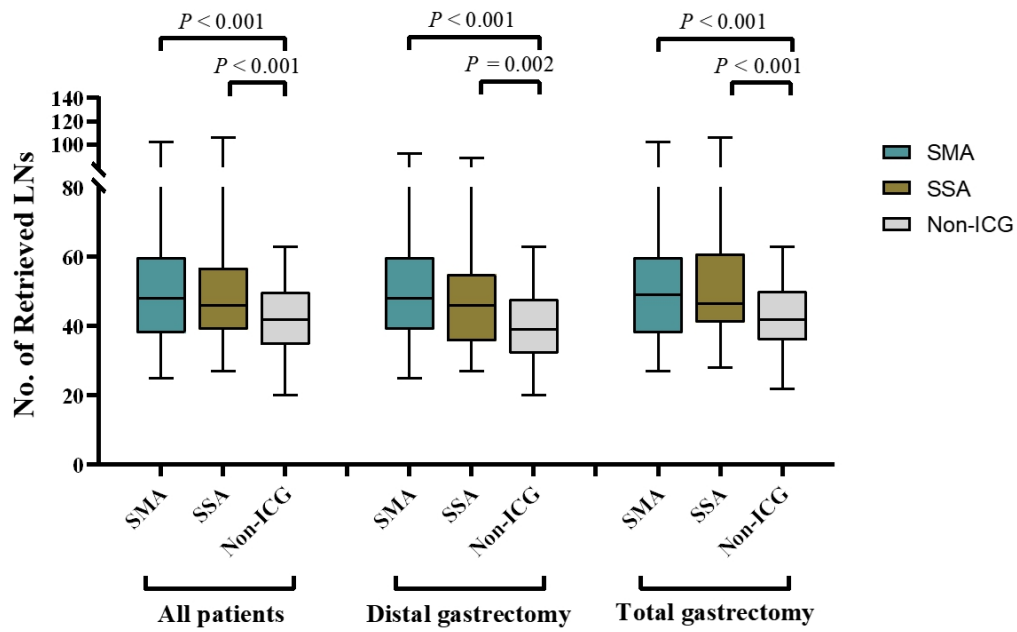

**Figure 8. Total Number of Retrieved Lymph Nodes in the SMA, SSA and Non-ICG Groups**  
 SMA, submucosa approach; SSA, subserosa approach.

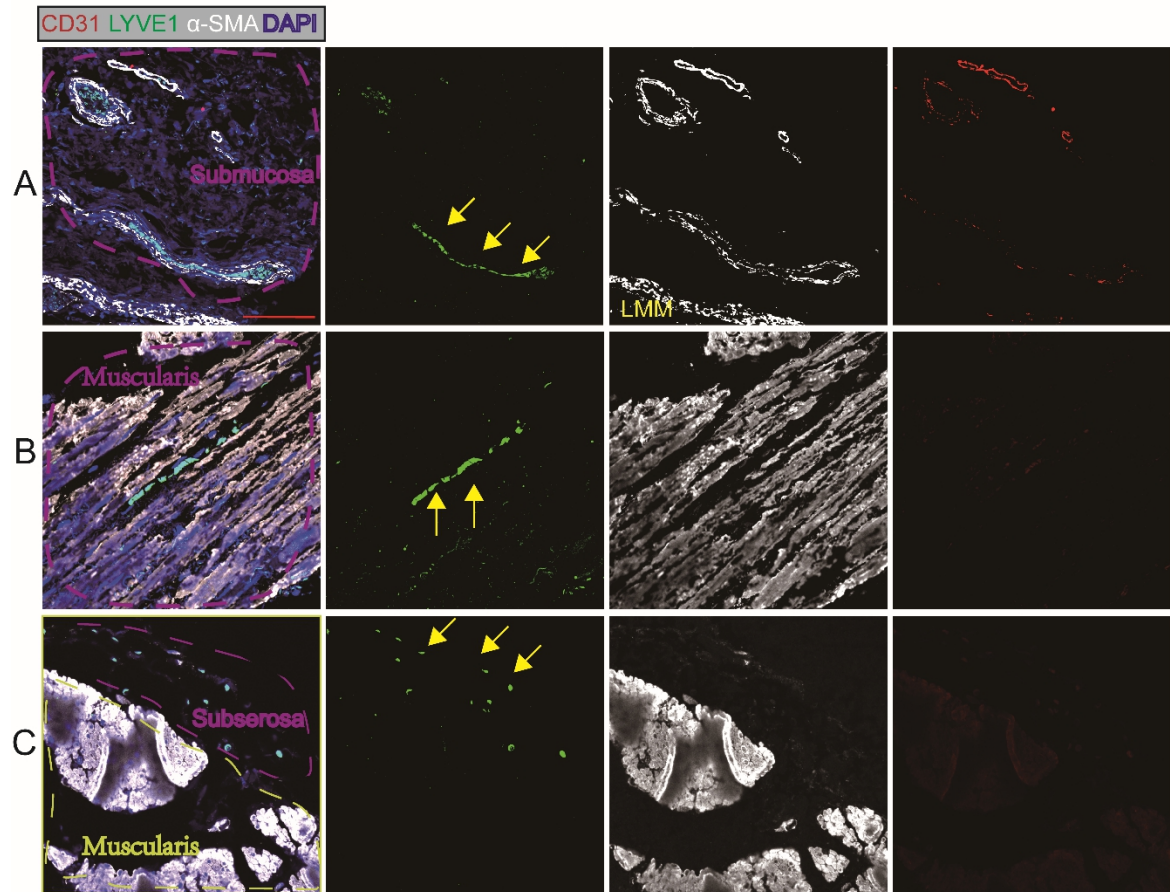

**eFigure 9. The Lymphatic System in the Gastric Wall.** A, submucous plexus; B, lymphatic vessels among the muscular fibers; C, subserous plexus. LYVE1 indicates lymphatic vessels, CD31 indicates blood vessels, α-SMA indicates smooth muscle. Abbreviations: LMM: lamina muscularis mucosae.

The yellow arrow represents lymphatic vessels. Scale bar: 100um
